# Supplementary material for: Nanoporous trimetallic PdCuAg alloys as efficient electrocatalysts by all-direction accessibility and synergetic effects
Source: Royal Society of Chemistry journal article supplement (doi:10.1039/d1ta10558b), 2022-01-01
Supplement: d1ta10558b1.pdf [file d1ta10558b1.pdf]

**Nanoporous trimetallic PdCuAg alloys as efficient electrocatalysts by  
all-direction accessibility and synergetic effects**

Jun-Xuan Li,<sup>a</sup> Hong-Xing Yin,<sup>b</sup> Qinghong Geng,<sup>a</sup> Dawei Du,<sup>a</sup> Lian Ma,<sup>a</sup> Longlong  
Fan,<sup>a</sup> Qingfeng Hua<sup>a</sup> and Cuiling Li\*<sup>a</sup>

<sup>a</sup>Key Laboratory of Cluster Science, Ministry of Education, Beijing Key Laboratory of  
Photoelectronic/Electrophotonic Conversion Materials, School of Chemistry and  
Chemical Engineering, Beijing Institute of Technology, Beijing 100081, China

<sup>b</sup> Analysis & Testing Center, Beijing Institute of Technology, Beijing 100081, China

E-mail: licuiling@bit.edu.cn

## Experimental Procedures

**Chemicals.** Sodium tetrachloropalladate ( $\text{Na}_2\text{PdCl}_4$ ), Pluronic P123 and F127, L-ascorbic acid (AA), commercial palladium black (PdB) nanoparticles, Nafion solution (5 wt% in alcohol and  $\text{H}_2\text{O}$ ) were purchased from Sigma Aldrich. 1,3,5-trimethyl benzene (TMB), copper(II) chloride dehydrate ( $\text{CuCl}_2 \cdot 2\text{H}_2\text{O}$ ), potassium hydroxide (KOH) were purchased from J&K Scientific Ltd. (Beijing, China). Silver nitrate ( $\text{AgNO}_3$ ) and hydrochloric acid (HCl) were obtained from Xilong Chemical Industry Co., Ltd. (Sichuan, China).

**Characterization.** A field emission scanning electron microscope (SEM, Zeiss Supra 55, Zeiss, Germany) operating at 20 kV was used to observe the morphology of PdCuAg nanoparticles. Transmission electron microscopy (TEM), high-angle annular dark field (HAADF) images, and energy-dispersive X-ray (EDX) mapping were observed with a FEI, Talos F200X apparatus (Thermo Fisher, the United States) at an accelerating voltage of 200 kV. X-ray diffraction (XRD) characterization was carried recorded on Ultima IV X-ray diffractometer (Rigaku, Japan) at a scanning rate of 1.5 degrees per min with a Cu-K $\alpha$  radiation (40 kV, 40 mA) source. X-ray photoelectron spectroscopy (XPS) analysis was conducted on PHI 5000 Versaprobe III scanning microprobe multi-functional X-ray photoelectron spectroscopy (ULVAC-PHI, Japan). ICP-MS and ICP-OES were recorded on Agilent 7800 and Agilent 5110 spectrometer (Agilent Technologies, the United States), respectively.

**Synthesis of nanoporous PdCuAg nanoparticles.** The nanoporous PdCuAg nanoparticles were prepared via a swollen agent-merging-micelles approach. In a typical synthesis, 5 mg of P123, 15 mg of F127, and 10  $\mu\text{L}$  of TMB were first dissolved in 1.4 mL of mixed  $\text{H}_2\text{O}$ /ethanol solution (volume ratio of 2:5) under ultrasonication to form the swollen agent-merging micelle solution, followed by the addition of 50  $\mu\text{L}$  of HCl (1 M HCl for  $\text{d}_{71}\text{Cu}_{27}\text{Ag}_2$  and  $\text{Pd}_{68}\text{Cu}_{26}\text{Ag}_{11}$ , 5 M HCl for  $\text{Pd}_{66}\text{Cu}_{23}\text{Ag}_{11}$  and

Pd<sub>64</sub>Cu<sub>22</sub>Ag<sub>14</sub>). Then, 0.4 mL of 40 mM H<sub>2</sub>PdCl<sub>4</sub>, 0.2 mL of 40 mM CuCl<sub>2</sub> and certain amount of 40 mM AgNO<sub>3</sub>, were successively added, and the molar ratio of [PdCl<sub>4</sub>]<sup>2-</sup>:Cu<sup>2+</sup>:Ag<sup>+</sup> in the mixed solution was controlled to be 65:33:2 to 63:31:6, 57:29:14 and 53:27:20. Subsequently, 0.5 mL of freshly prepared 200 mM ascorbic acid solution was injected. The mixed solution was further incubated at 90 °C for 10 h to yield a dark black solution. Finally, the samples were collected by centrifugation at 8000 rpm for 8 min, followed by consecutive washing/centrifugation cycles with ethanol.

**Electrochemical Measurements.** Electrochemical measurements were measured using a CHI 760E electrochemical analyzer (Chenhua Instrument Company, China). The three-electrode cell consisted of saturated calomel electrode (SCE) as the reference electrode, Pt wire as the counter electrode and glassy carbon electrode (GCE) modified by the catalysts as the working electrode. 1 mg of the as-obtained catalyst was ultrasonically dispersed in 1 mL ultrapure Milli-Q water (18.2 MΩ·cm) to form the catalyst ink. Then, 5 μL of the suspension was dropped onto the surface of the GCE. After the electrode was dried under ambient temperature, 2 μL of Nafion ethanol solution (0.05 vol%) was then dropped onto the catalysts. The electrode was air-dried for further electrochemical measurements. The ethanol oxidation reaction (EOR) measurement was carried out in the electrolyte containing 1 M C<sub>2</sub>H<sub>5</sub>OH and 1 M NaOH.

**Product Detection:** The EOR product analysis mainly focused on the carbonate (C1 product) and acetate (C2 product). For quantifying the liquid products, the electrolyte after chronoamperometric measurements at indicated potentials for 0.5 h was collected and analyzed by <sup>1</sup>H nuclear magnetic resonance (<sup>1</sup>H-NMR) and Ion Chromatography, respectively. For <sup>1</sup>H-NMR analysis, 0.5 mL of electrolyte was mixed with 0.1 mL of D<sub>2</sub>O (DMSO concentration of 100 ppm). The Ion Chromatograph was equipped with 930 Compact IC flex and 919 autosampler plus. Separations were done on a Metrosep organic Acid-250/7.8 chromatographic column, coupled with a Metrosep RP2 Guard column. The 0.5 mM H<sub>2</sub>SO<sub>4</sub> and 100 mM LiCl solutions were used as eluent and regenerant, respectively. An intelligent conductivity detector with a chemical suppressor (MSM) was used for detection. Calibration standards (formic acid and acetic

acid) were prepared in a series of concentrations, and the linear correlation coefficient was >99.9%. In the case of ion chromatography detection, 5.0 mL of electrolyte was diluted with 5.0 mL H<sub>2</sub>O. After the quantification, the faradaic efficiency (FE) of the products were calculated as follows:

$$\text{FE (\%)} = \frac{\text{amount of product} \times n \times F}{C} \times 100\%$$

where  $n$  is number of moles of electrons to participate in the faradaic reaction,  $F$  is the Faraday constant (96485 C mol<sup>-1</sup>), and  $C$  is the amount of charge passed through the working electrode.

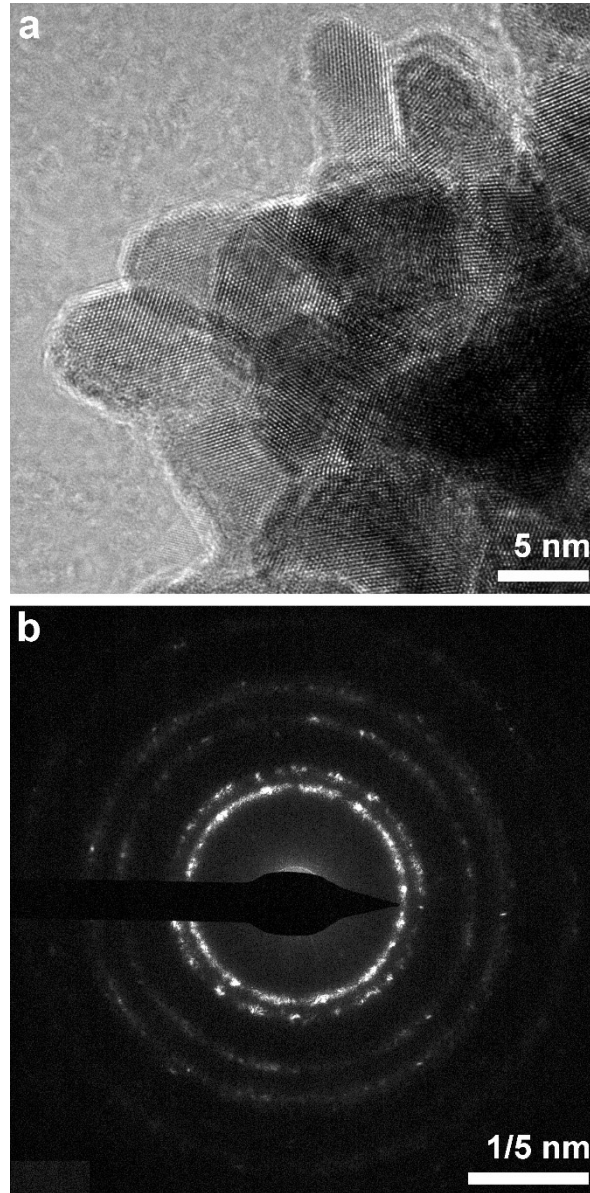

**Fig. S1** (a) HRTEM image of the edge of one nanoporous  $\text{Pd}_{68}\text{Cu}_{26}\text{Ag}_6$  nanoparticle and (b) SAED derived from one nanoporous  $\text{Pd}_{68}\text{Cu}_{26}\text{Ag}_6$  nanoparticle. Both results reveal the polycrystallinity of the products.

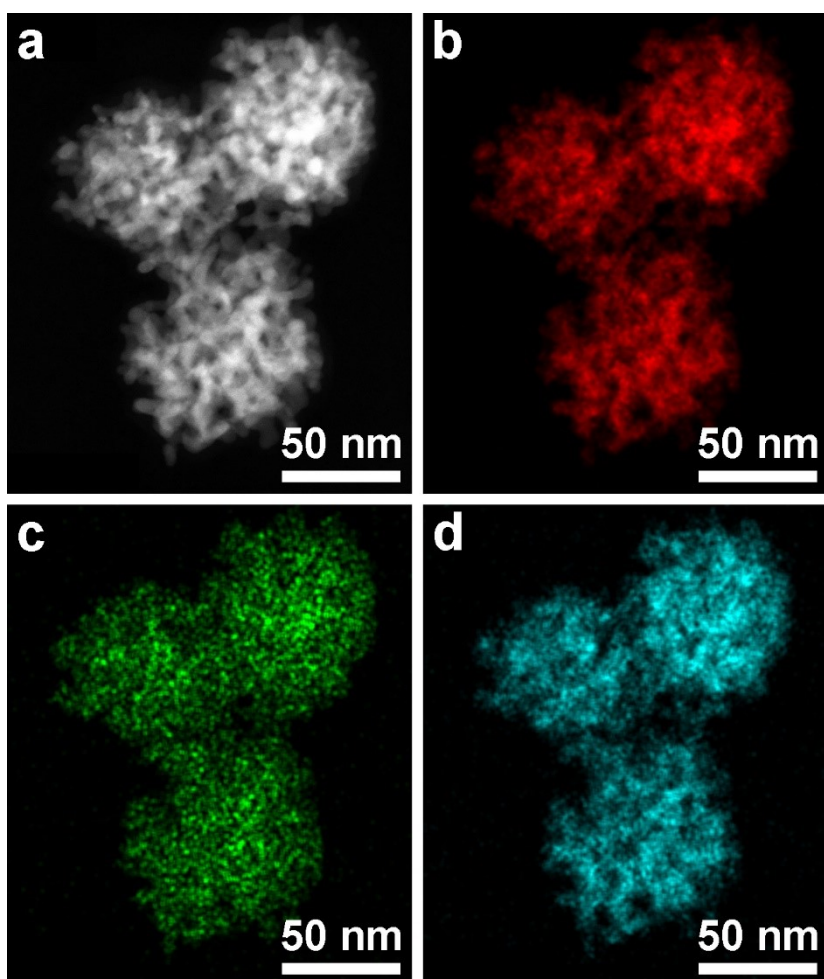

**Fig. S2** (a) HAADF-STEM image and corresponding elemental maps ((b) Pd, (c) Cu and (d) Ag) of nanoporous Pd<sub>71</sub>Cu<sub>27</sub>Ag<sub>2</sub> nanoparticles.

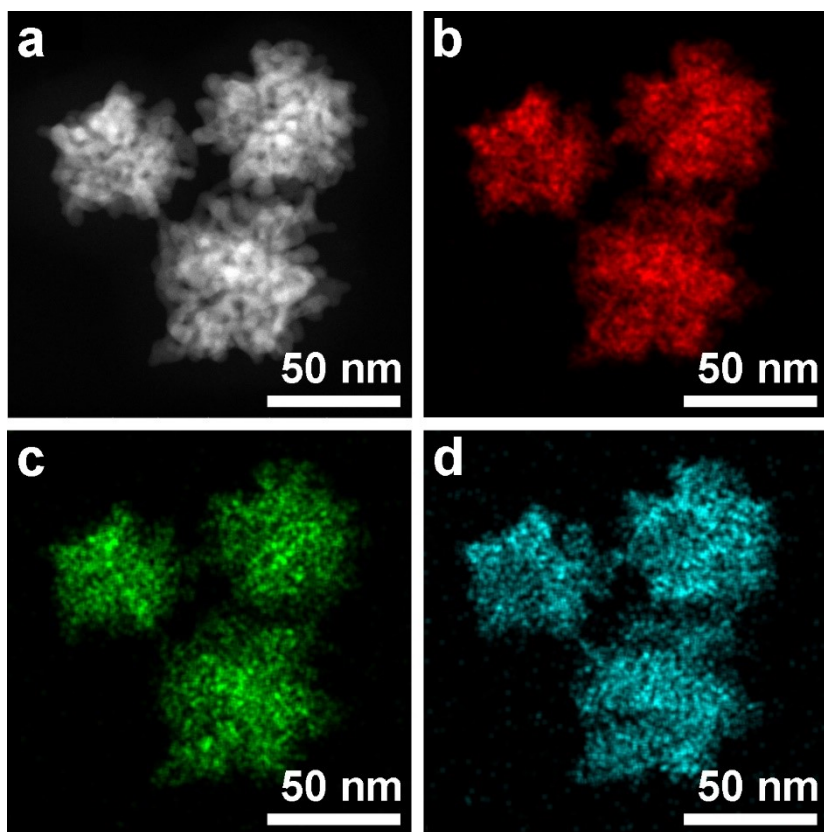

**Fig. S3** (a) HAADF-STEM image and corresponding elemental maps ((b) Pd, (c) Cu and (d) Ag) of nanoporous Pd<sub>66</sub>Cu<sub>23</sub>Ag<sub>11</sub> nanoparticles.

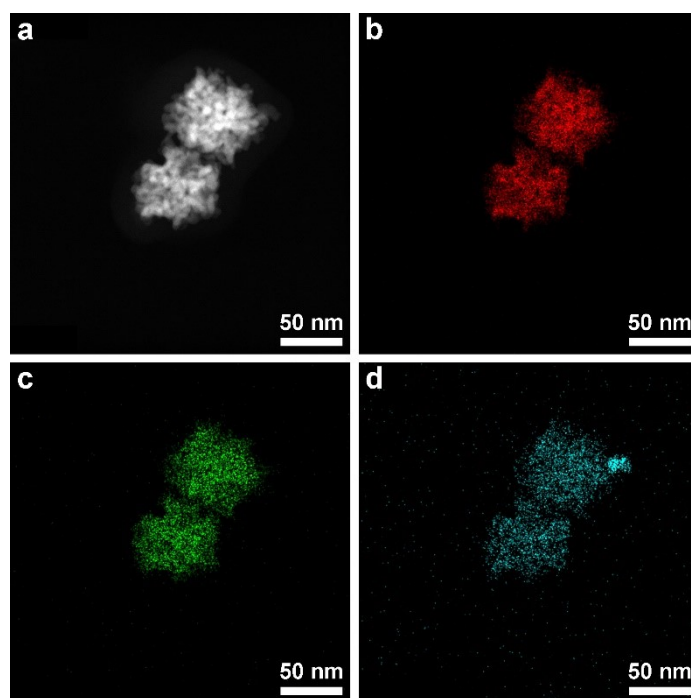

**Fig. S4** (a) HAADF-STEM image and corresponding elemental maps ((b) Pd, (c) Cu and (d) Ag) of nanoporous Pd<sub>64</sub>Cu<sub>22</sub>Ag<sub>14</sub> nanoparticles.



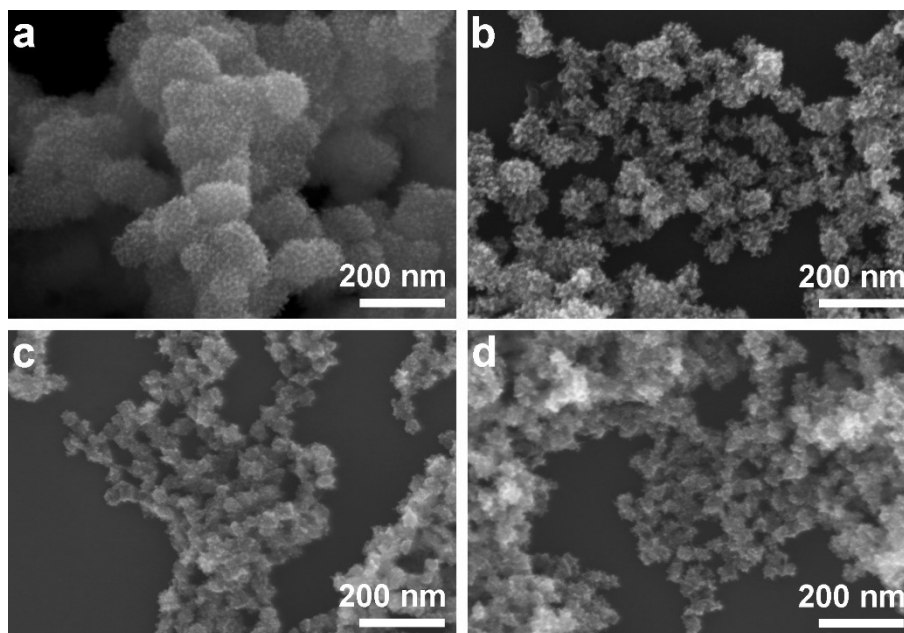

**Fig. S5** Typical SEM images of the nanoporous Pd<sub>68</sub>Cu<sub>26</sub>Ag<sub>6</sub> nanoparticles by changing the TMB amounts: (a) 0  $\mu$ L, (b) 10  $\mu$ L, (c) 20  $\mu$ L and (d) 50  $\mu$ L, respectively.

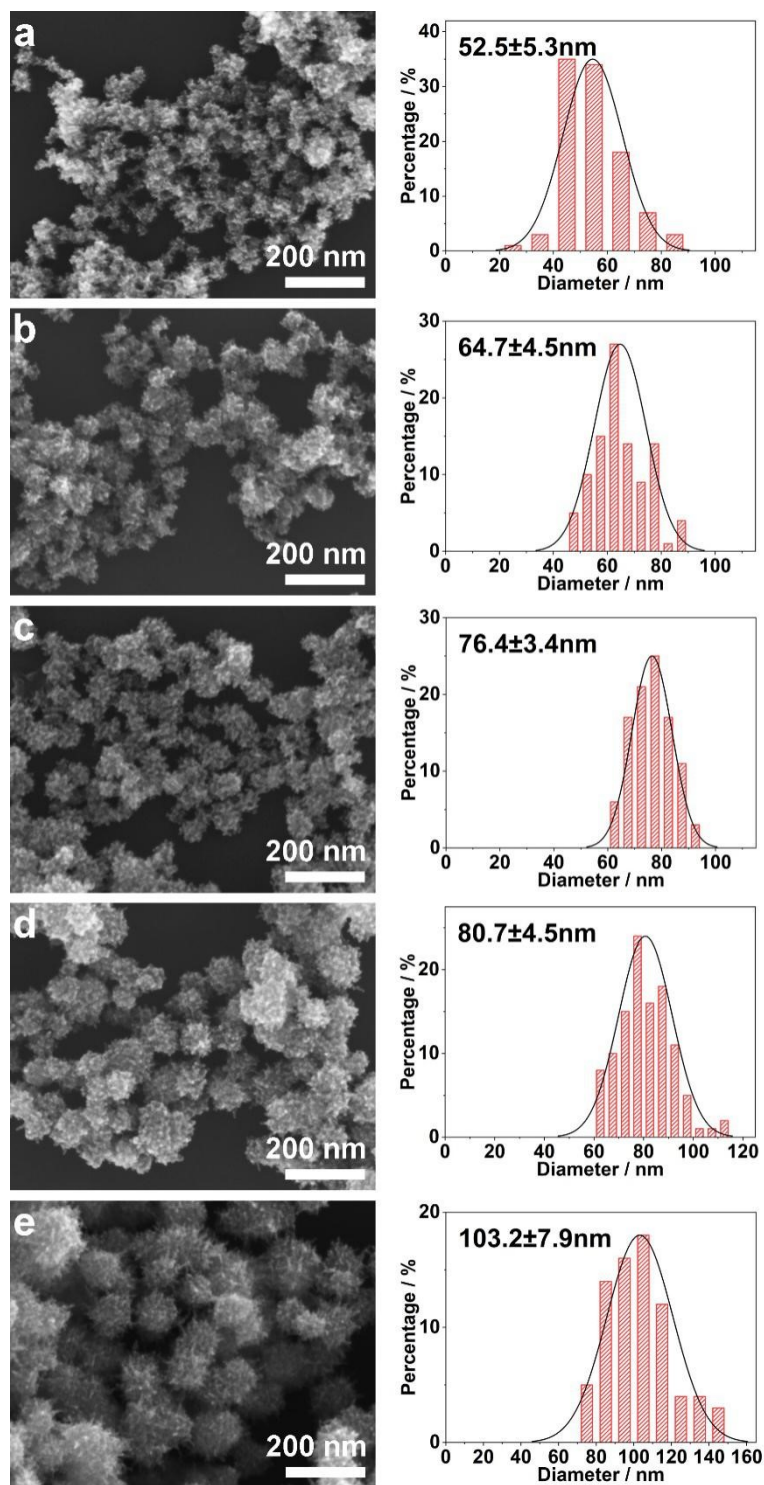

**Fig. S6** Typical SEM images of the nanoporous Pd<sub>68</sub>Cu<sub>26</sub>Ag<sub>6</sub> nanoparticles by changing the HCl concentrations: (a) 3.9 mM, (b) 9.6 mM, (c) 19.3 mM, (d) 57.7 mM and (e) 96.2 mM, respectively. The histograms on the right side show the distributions of the corresponding particle sizes.

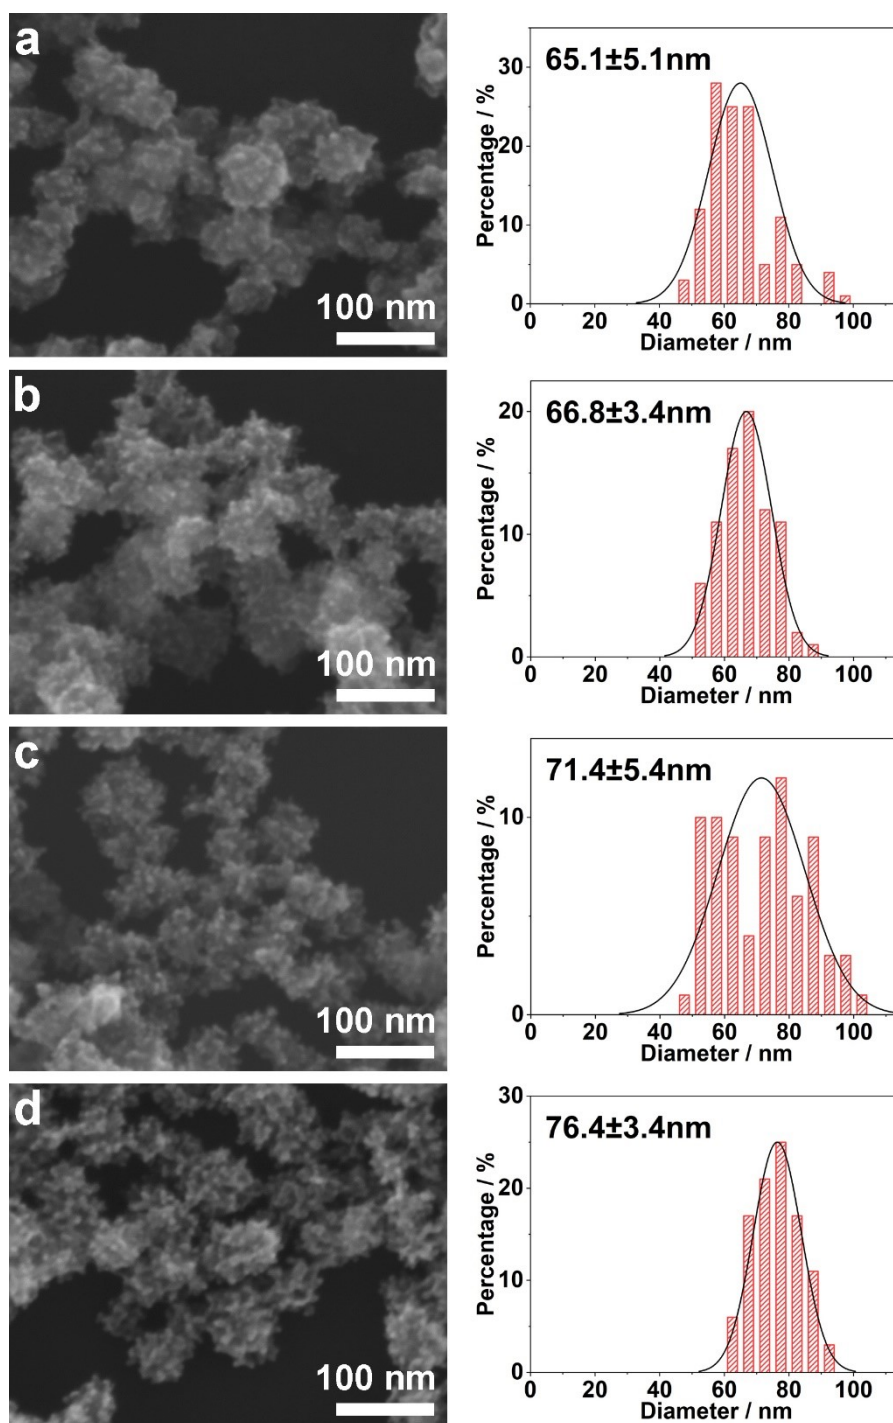

**Fig. S7** Typical SEM images of the products collected at different reaction times: (a) 5 min, (b) 20 min, (c) 5 h and (d) 10 h, respectively. The histograms on the right side show the distributions of the corresponding particle sizes.

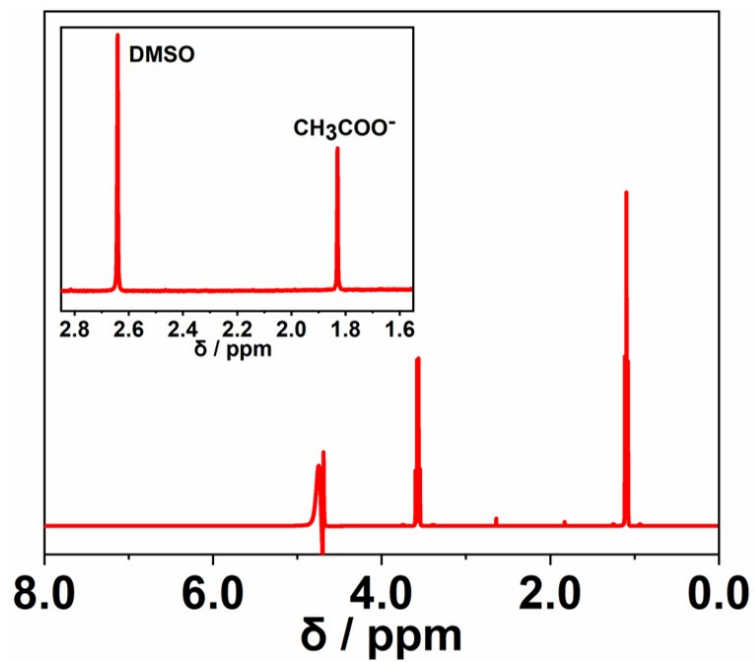

**Fig. S8** Representative  $^1\text{H-NMR}$  spectra of the electrolyte after EOR catalyzed by  $\text{Pd}_{68}\text{Cu}_{26}\text{Ag}_6$  nanoparticles at  $-0.3$  V vs. SCE for 0.5 h. DMSO is used as an internal standard for quantification of  $\text{CH}_3\text{COO}^-$  and  $\text{HCOO}^-$ .

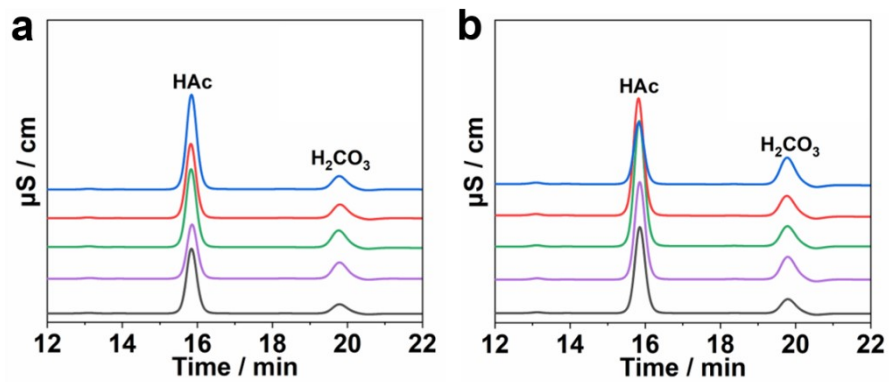

**Fig. S9** Representative ion chromatographic spectra of the electrolyte after EOR catalyzed by Pd<sub>71</sub>Cu<sub>27</sub>Ag<sub>2</sub> (blue), Pd<sub>68</sub>Cu<sub>26</sub>Ag<sub>6</sub> (red), Pd<sub>66</sub>Cu<sub>23</sub>Ag<sub>11</sub> (green), Pd<sub>64</sub>Cu<sub>22</sub>Ag<sub>14</sub> (purple) and PdB (black) at (a) -0.2 V *vs.* SCE and (b) -0.3 V *vs.* SCE for 0.5 h.

**Table S1** Summary of the metal compositions and size parameters of the final products.

| <b>Samples</b>                                     | <b>Molar ratio of Pd:Cu:Ag in the precursors</b> | <b>Molar ratio of Pd:Cu:Ag in the products</b> | <b>Surface mole percentage of Pd confirmed by XPS (%)</b> | <b>Average particle size (nm)</b> | <b>Grain size (nm)</b> |
|----------------------------------------------------|--------------------------------------------------|------------------------------------------------|-----------------------------------------------------------|-----------------------------------|------------------------|
| Pd <sub>71</sub> Cu <sub>27</sub> Ag <sub>2</sub>  | 65:33:2                                          | 71:27:2                                        | 84                                                        | 81.3 ± 4.2                        | 7.9                    |
| Pd <sub>68</sub> Cu <sub>26</sub> Ag <sub>6</sub>  | 63:31:6                                          | 68:26:6                                        | 76                                                        | 76.4 ± 3.4                        | 7.5                    |
| Pd <sub>66</sub> Cu <sub>23</sub> Ag <sub>11</sub> | 57:29:14                                         | 66:23:11                                       | 72                                                        | 60.9 ± 4.6                        | 6.7                    |
| Pd <sub>64</sub> Cu <sub>22</sub> Ag <sub>14</sub> | 53:27:20                                         | 64:22:14                                       | 70                                                        | 50.0 ± 4.7                        | 6.5                    |

**Table S2** A summary of the EOR activity on Pd-based electrocatalysts in alkaline solution.

| Electrocatalyst                                              | Electrolyte                                       | Scan rate (mV s <sup>-1</sup> ) | Mass activity (A mg <sup>-1</sup> _Pd) | Reference        |
|--------------------------------------------------------------|---------------------------------------------------|---------------------------------|----------------------------------------|------------------|
| <b>Pd<sub>68</sub>Cu<sub>26</sub>Ag<sub>6</sub></b>          | <b>1 M KOH +1 M C<sub>2</sub>H<sub>5</sub>OH</b>  | <b>50</b>                       | <b>4.04</b>                            | <b>This work</b> |
| Pd <sub>1</sub> Cu <sub>1.2</sub> nanocages                  | 1 M KOH +1 M C <sub>2</sub> H <sub>5</sub> OH     | 50                              | 1.79                                   | S1               |
| Pd <sub>2</sub> Ag <sub>1</sub> single-crystalline nanowires | 1 M KOH +1 M C <sub>2</sub> H <sub>5</sub> OH     | 50                              | 2.84                                   | S2               |
| PdAg nanodendrites                                           | 1 M KOH +1 M C <sub>2</sub> H <sub>5</sub> OH     | 50                              | 2.60                                   | S3               |
| C-PdSn/SnO <sub>x</sub>                                      | 1 M KOH +1 M C <sub>2</sub> H <sub>5</sub> OH     | 50                              | 3.2                                    | S4               |
| Au@Pd Nanorods                                               | 1 M KOH +1 M C <sub>2</sub> H <sub>5</sub> OH     | 50                              | 2.92                                   | S5               |
| PdNi particle networks                                       | 1 M KOH +1 M C <sub>2</sub> H <sub>5</sub> OH     | 50                              | 2.4                                    | S6               |
| Pd <sub>21</sub> Cu <sub>79</sub>                            | 0.5 M KOH +0.5 M C <sub>2</sub> H <sub>5</sub> OH | 50                              | 1.78                                   | S7               |
| Pd <sub>4</sub> Ir <sub>2</sub> Ni <sub>1</sub> /C           | 1 M KOH +1 M C <sub>2</sub> H <sub>5</sub> OH     | 50                              | 0.52                                   | S8               |
| PdAg hollow nanoflowers                                      | 1 M KOH +1 M C <sub>2</sub> H <sub>5</sub> OH     | 50                              | 1.62                                   | S9               |
| PdAgNi/C                                                     | 1 M KOH +1 M C <sub>2</sub> H <sub>5</sub> OH     | 50                              | 2.7                                    | S10              |
| PdCu nanoparticles                                           | 1 M KOH +1 M C <sub>2</sub> H <sub>5</sub> OH     | 50                              | 2.36                                   | S11              |
| Pd <sub>3</sub> Sn-nanodots                                  | 1 M KOH +1 M C <sub>2</sub> H <sub>5</sub> OH     | 50                              | 4.02                                   | S12              |
| PdAu 3:1/C <sub>1</sub>                                      | 0.5 M KOH +0.2 M C <sub>2</sub> H <sub>5</sub> OH | 50                              | 0.10                                   | S13              |
| Pd <sub>7</sub> /Ru <sub>1</sub> nanodendrites               | 1 M KOH +1 M C <sub>2</sub> H <sub>5</sub> OH     | 50                              | ~1.15                                  | S14              |
| Au@PdAuCu mesospheres                                        | 1 M KOH +1 M C <sub>2</sub> H <sub>5</sub> OH     | 50                              | 3.99                                   | S15              |
| PdCo nanotube /carbon cloth                                  | 1 M KOH +1 M C <sub>2</sub> H <sub>5</sub> OH     | 50                              | ~1.50                                  | S16              |
| CuPdNiP nanohollow structure                                 | 1 M KOH +1 M C <sub>2</sub> H <sub>5</sub> OH     | 50                              | 1.19                                   | S17              |

|                                              |                                                    |    |       |     |
|----------------------------------------------|----------------------------------------------------|----|-------|-----|
| In <sub>3</sub> Pd <sub>2</sub> /C           | 1 M KOH +1 M<br>C <sub>2</sub> H <sub>5</sub> OH   | 50 | 2.82  | S18 |
| Pd <sub>4</sub> Au <sub>1</sub> -P/PDIL-CNTs | 1 M KOH +1 M<br>C <sub>2</sub> H <sub>5</sub> OH   | 50 | 2.30  | S19 |
| Pd-NiCoO <sub>x</sub> /C                     | 0.5 M KOH +1<br>M C <sub>2</sub> H <sub>5</sub> OH | 50 | ~0.45 | S20 |



**Table S3** Faradic efficiency for C1 or C2 reaction pathway estimated based on the IC quantification toward reaction products.

| <b>Electrocatalyst</b>                             | <b>Potential (V vs. SCE)</b> | <b>FE-C2 products (%)</b> | <b>FE-C1 products (%)</b> |
|----------------------------------------------------|------------------------------|---------------------------|---------------------------|
| Pd <sub>71</sub> Cu <sub>27</sub> Ag <sub>2</sub>  | -0.2                         | 95.74                     | 4.26                      |
|                                                    | -0.3                         | 94.00                     | 6.00                      |
| Pd <sub>68</sub> Cu <sub>26</sub> Ag <sub>6</sub>  | -0.2                         | 94.92                     | 5.08                      |
|                                                    | -0.3                         | 96.55                     | 3.45                      |
| Pd <sub>66</sub> Cu <sub>23</sub> Ag <sub>11</sub> | -0.2                         | 97.86                     | 2.14                      |
|                                                    | -0.3                         | 94.51                     | 5.49                      |
| Pd <sub>64</sub> Cu <sub>22</sub> Ag <sub>14</sub> | -0.2                         | 94.98                     | 5.02                      |
|                                                    | -0.3                         | 95.64                     | 4.36                      |
| PdB                                                | -0.2                         | 97.78                     | 2.22                      |
|                                                    | -0.3                         | 97.59                     | 2.41                      |

## REFERENCES

- S1. P. Yu, H. Xu, L. Jin, C. Chen, H. Shang, Q. Liu and Y. Du, *J. Colloid Interface Sci.*, 2019, **555**, 195-202.
- S2. H. Lv, Y. Wang, A. Lopes, D. Xu and B. Liu, *Appl. Catal., B*, 2019, **249**, 116-125.
- S3. W. Huang, X. Kang, C. Xu, J. Zhou, J. Deng, Y. Li and S. Cheng, *Adv. Mater.*, 2018, **30**, 1706962.
- S4. Q. Gao, T. Mou, S. Liu, G. Johnson, X. Han, Z. Yan, M. Ji, Q. He, S. Zhang, H. Xin and H. Zhu, *J. Mater. Chem. A*, 2020, **8**, 20931-20938.
- S5. Y. Chen, Z. Fan, Z. Luo, X. Liu, Z. Lai, B. Li, Y. Zong, L. Gu and H. Zhang, *Adv. Mater.*, 2017, **29**, 1701331.
- S6. J. Ding, S. Ji, H. Wang, B. G. Pollet and R. Wang, *J. Appl. Electrochem.*, 2018, **49**, 39-44.
- S7. J. Yin, S. Shan, M. S. Ng, L. Yang, D. Mott, W. Fang, N. Kang, J. Luo and C. J. Zhong, *Langmuir*, 2013, **29**, 9249-9258.
- S8. A. Elsheikh, H. M. Mousa and J. McGregor, *Micromachines*, 2021, **12**, 1327.
- S9. D. Bin, B. Yang, K. Zhang, C. Wang, J. Wang, J. Zhong, Y. Feng, J. Guo and Y. Du, *Chem. Eur. J.*, 2016, **22**, 16642-16647.
- S10. A. Elsheikh and J. McGregor, *Nanomaterials*, 2021, **11**, 2244.
- S11. Y. Cheng, J. Xue, M. Yang, H. Li and P. Guo, *Inorg. Chem.*, 2020, **59**, 10611-10619.
- S12. T. Song, F. Gao, Y. Zhang, P. e. Yu, C. Wang, Y. Shiraishi, S. Li, C. Wang, J. Guo and Y. Du, *J. Taiwan Inst. Chem. Eng.*, 2019, **101**, 167-176.
- S13. B. Jin, Y. Zhang and L. Zhao, *J. Appl. Electrochem.*, 2016, **46**, 1147-1155.
- S14. K. Zhang, D. Bin, B. Yang, C. Wang, F. Ren and Y. Du, *Nanoscale*, 2015, **7**, 12445-12451.
- S15. H. Lv, L. Sun, X. Chen, D. Xu and B. Liu, *Green Chem.*, 2019, **21**, 2043-2051.

- S16. A. L. Wang, X. J. He, X. F. Lu, H. Xu, Y. X. Tong and G. R. Li, *Angew. Chem. Int. Ed.*, 2015, **54**, 3669-3673.
- S17. D. Chen, R.-H. Zhang, Q.-Y. Hu, Y.-F. Guo, W. Zhan, S.-N. Chen, X.-W. Zhou and Z.-X. Dai, *ACS Appl. Energy Mater.*, 2019, **2**, 5525-5533.
- S18. Y. J. Chen, Y. R. Chen, C. H. Chiang, K. L. Tung, T. K. Yeh and H. Y. Tuan, *Nanoscale*, 2019, **11**, 3336-3343.
- S19. H. Yang, Z. Yu, S. Li, Q. Zhang, J. Jin and J. Ma, *J. Catal.*, 2017, **353**, 256-264.
- S20. W. Wang, Y. Yang, Y. Liu, Z. Zhang, W. Dong and Z. Lei, *J. Power Sources*, 2015, **273**, 631-637.
